# Supplementary material for: Prescriber barriers and enablers to minimising potentially inappropriate medications in adults: a systematic review and thematic synthesis
Source: HighWire-hosted journal article supplement (doi:10.1136/bmjopen-2014-006544), 2014-12-01
Supplement: bmjopen-2014-006544supp_table.pdf [file bmjopen-2014-006544supp_table.pdf]

**Comprehensiveness of reporting assessment using COREQ (consolidated criteria for reporting qualitative research) checklist.**

Key – Benzo = Benzodiazepines. CME = Continuing Medical Education. F = Female. FG = Focus group. Dept = Department. GP = General Practitioner. M = Male. MD = Medical doctor. NH = Nursing home. NP = Nurse Practitioner. NS = Not stated. PhD = Doctor of Philosophy. RCT = Randomised Control Trial. SSI = Semi-structure interview. VA = Veterans Affairs. Other abbreviations refer to study author initials.

|                                         |                           | Lead author                                                   | Anthieren s                                                        | Britt en -               | Cant rill | Clyn e                | Cook | Dam esto y         | Dicki nson                        | Dybwa d | Flick | Frich                            | Frie d | Iden                             | Illiffe              | Moen | Parr | Raghu nath                                    | Roger s                                                                                         | Schuli ng            | Spin ewin e | Sube jl | Wer meli ng |
|-----------------------------------------|---------------------------|---------------------------------------------------------------|--------------------------------------------------------------------|--------------------------|-----------|-----------------------|------|--------------------|-----------------------------------|---------|-------|----------------------------------|--------|----------------------------------|----------------------|------|------|-----------------------------------------------|-------------------------------------------------------------------------------------------------|----------------------|-------------|---------|-------------|
| Domain 1: Research team and reflexivity |                           |                                                               |                                                                    |                          |           |                       |      |                    |                                   |         |       |                                  |        |                                  |                      |      |      |                                               |                                                                                                 |                      |             |         |             |
| Personal Characteristics                |                           |                                                               |                                                                    |                          |           |                       |      |                    |                                   |         |       |                                  |        |                                  |                      |      |      |                                               |                                                                                                 |                      |             |         |             |
| 1                                       | Intervie wer/faci litator | Which author/s conduct ed the intervieu w or focus group?     | Yes - AT colle cted data. T Strobe took and processe d intervieu s | N/A Desc riptive surv ey | JD        | FG - MB &BC, SSI - BC | JMC  | NS                 | NS                                | TBD     | NS    | JCF & SH                         | TRF    | KI                               | NS - 2 resea rcher s | Ring | JP   | ASR did 1, 'Non-clinici ans' did remai ning 4 | NS                                                                                              | HJG & JS (obser ver) | AS          | NS      | GB          |
| 2                                       | Credenti als              | What were the research er's credenti als? <i>E.g. PhD, MD</i> | NS                                                                 | Mast ers, MD             | Mast ers  | NS                    | PhD  | MD, PhD & Mast ers | Mast ers, PhD, MD, Psyc hiatrists | MD      | NS    | MD qualif icatio n as a mini mum | MD     | MD quali ficatio n as a mini mum | NS                   | PhD  | NS   | NS                                            | Profes sor of sociol ogy, Clinic al Psych ologis t & resear cher, 3 med stude nts, 1 GP & Senio | NS - ? MD            | PhD min     | NS      | NS          |

|   |                         |                                                      |                      |    |                     |    |                                                                     |    |                                    |                                     |    |    |    |                                                         |    |    |    |                                              |           |    |                                       |    |    |
|---|-------------------------|------------------------------------------------------|----------------------|----|---------------------|----|---------------------------------------------------------------------|----|------------------------------------|-------------------------------------|----|----|----|---------------------------------------------------------|----|----|----|----------------------------------------------|-----------|----|---------------------------------------|----|----|
|   |                         |                                                      |                      |    |                     |    |                                                                     |    |                                    |                                     |    |    |    |                                                         |    |    |    |                                              | lecturer  |    |                                       |    |    |
| 3 | Occupation              | What was their occupation at the time of the study?  | NS                   | NS | Research pharmacist | NS | Research psychologist                                               | NS | Researchers, academics, clinicians | GP – 'Important as they were peers' | NS | NS | NS | All are specialists in family medicine, experienced GPs | NS | NS | NS | NS - 1 clinician, remaining authors were not | See above | NS | Clinical pharmacist & research fellow | NS | NS |
| 4 | Gender                  | Was the researcher male or female?                   | Y - could be derived | NS | F                   | F  | F                                                                   | F  | NS                                 | F                                   | M  | F  | F  | F                                                       | NS | F  | F  | NS                                           | Mix       | M  | F                                     | NS | F  |
| 5 | Experience and training | What experience or training did the researcher have? | NS                   | NS | NS                  | NS | Experienced research psychologist, specialist in geriatrics & disse | NS | NS                                 | NS                                  | NS | NS | NS | NS                                                      | NS | NS | NS | NS                                           | Inferred  | NS | NS                                    | NS | NS |

|                                |                                          |                                                                                                                 |    |    |    |    |    |          |                                                                                                            |                                                                                                                 |                                                            |                                                              |    |                                                                                  |                                                               |    |    |                           |    |                                                                                                        |                                  |                                                |                                                                    |  |
|--------------------------------|------------------------------------------|-----------------------------------------------------------------------------------------------------------------|----|----|----|----|----|----------|------------------------------------------------------------------------------------------------------------|-----------------------------------------------------------------------------------------------------------------|------------------------------------------------------------|--------------------------------------------------------------|----|----------------------------------------------------------------------------------|---------------------------------------------------------------|----|----|---------------------------|----|--------------------------------------------------------------------------------------------------------|----------------------------------|------------------------------------------------|--------------------------------------------------------------------|--|
|                                |                                          |                                                                                                                 |    |    |    |    |    | mination |                                                                                                            |                                                                                                                 |                                                            |                                                              |    |                                                                                  |                                                               |    |    |                           |    |                                                                                                        |                                  |                                                |                                                                    |  |
| Relationship with participants |                                          |                                                                                                                 |    |    |    |    |    |          |                                                                                                            |                                                                                                                 |                                                            |                                                              |    |                                                                                  |                                                               |    |    |                           |    |                                                                                                        |                                  |                                                |                                                                    |  |
| 6                              | Relationship established                 | Was a relationship established prior to study commencement?                                                     | NS | NS | NS | NS | NS | NS       | NS                                                                                                         | Peers - hence random selection of low-med prescribers (minimise selection bias) to match high prescriber sample | NS                                                         | NS - Run by Academic Dept GP + Norwegian Medical Association | NS | NS                                                                               | Contact with practice staff when recruiting patients for SSIs | NS | NS | Mix - known and not known | NS | NS but likely - GP trainers and study conducted through Dept of General Practice at a local University | NS                               | Yes as this was a follow-up to a study in 2006 | Follow-up to cross-sectional observation study so some familiarity |  |
| 7                              | Participant knowledge of the interviewer | What did the participants know about the researcher? e.g. <i>personal goals, reasons for doing the research</i> | NS | NS | NS | NS | NS | NS       | Peers + Qualitative study accompanied survey of all prescriptions for Benzos and opiates in Oslo revealing | NS                                                                                                              | NS - Some participants had prior knowledge of the project. | NS                                                           | NS | Practices had been recruited into an RCT of Benzos withdrawal in long term users | NS                                                            | NS | NS | NS                        | NS | NS - Although Spinewin is well published in this space                                                 | Have insight from previous study | NS                                             |                                                                    |  |

|                        |                             |                                                                                                                                                  |    |    |    |    |                                          |    |    |                                                                                                                          |    |                                                         |    |                                                                                             |    |    |    |    |                                    |    |    |    |    |
|------------------------|-----------------------------|--------------------------------------------------------------------------------------------------------------------------------------------------|----|----|----|----|------------------------------------------|----|----|--------------------------------------------------------------------------------------------------------------------------|----|---------------------------------------------------------|----|---------------------------------------------------------------------------------------------|----|----|----|----|------------------------------------|----|----|----|----|
|                        |                             |                                                                                                                                                  |    |    |    |    |                                          |    |    | prescribing profile of every Dr in area-participants would have had an idea about researchers' interests and motivations |    |                                                         |    |                                                                                             |    |    |    |    |                                    |    |    |    |    |
| 8                      | Interviewer characteristics | What characteristics were reported about the interviewer/facilitator? e.g. <i>Bias, assumptions, reasons and interests in the research topic</i> | NS | NS | NS | NS | Specialist in geriatrics & dissemination | NS | NS | NS                                                                                                                       | NS | Interest in continuing medical education & quality care | NS | First author or has long experience as NH Dr, concerned about improving health care in NHs. | NS | NS | NS | NS | All had interest in mental health. | NS | NS | NS | NS |
| Domain 2: study design |                             |                                                                                                                                                  |    |    |    |    |                                          |    |    |                                                                                                                          |    |                                                         |    |                                                                                             |    |    |    |    |                                    |    |    |    |    |

| Theoretical framework |                                       |                                                                                                                                                                 |                                           |             |                                                                               |                                                                                        |                                                                                    |                          |                                                  |                                                                                                          |                                                                                      |                                  |                                                                     |                                         |                                                                                                 |                                                                                                |                                          |                                                 |                                                                                                    |                       |                                                         |                                                                         |                                       |
|-----------------------|---------------------------------------|-----------------------------------------------------------------------------------------------------------------------------------------------------------------|-------------------------------------------|-------------|-------------------------------------------------------------------------------|----------------------------------------------------------------------------------------|------------------------------------------------------------------------------------|--------------------------|--------------------------------------------------|----------------------------------------------------------------------------------------------------------|--------------------------------------------------------------------------------------|----------------------------------|---------------------------------------------------------------------|-----------------------------------------|-------------------------------------------------------------------------------------------------|------------------------------------------------------------------------------------------------|------------------------------------------|-------------------------------------------------|----------------------------------------------------------------------------------------------------|-----------------------|---------------------------------------------------------|-------------------------------------------------------------------------|---------------------------------------|
| 9                     | Methodological orientation and Theory | What methodological orientation was stated to underpin the study? <i>e.g. grounded theory, discourse analysis, ethnography, phenomenology, content analysis</i> | Qualitative methodology, content analysis | NS          | NS                                                                            | Theoretical analysis                                                                   | Narrative analysis                                                                 | Grounded theory analysis | Framework analysis                               | Phenomenological theory                                                                                  | Theoretical coding – presume analysis?                                               | Thematic content analysis        | Content analysis                                                    | Systematic text condensation & analysis | NS                                                                                              | Conventional context analysis                                                                  | Consensual Qualitative Research Approach | Grounded theory & constant comparative approach | NS (Infer grounded theory - exploratory qualitative study)                                         | NS                    | Grounded theory                                         | NS                                                                      | Framework analysis                    |
| Participant selection |                                       |                                                                                                                                                                 |                                           |             |                                                                               |                                                                                        |                                                                                    |                          |                                                  |                                                                                                          |                                                                                      |                                  |                                                                     |                                         |                                                                                                 |                                                                                                |                                          |                                                 |                                                                                                    |                       |                                                         |                                                                         |                                       |
| 10                    | Sampling                              | How were participants selected? <i>e.g. purposive, convenience, consecutive, snowball</i>                                                                       | Purposive                                 | Convenience | Purposive sampling of practices (across 4 health authorities) & patients with | Convenience sample of GPs working in a variety of different general practices involved | Purposive? "deliberate efforts to diversify experience level and practice setting" | Convenience              | Drugs of patients purposively selected for study | Purposive (high Prescribers selected based on script volume, low-medium prescribers matched by geography | Convenience - physicians attached to NHs who delivered the routine data arm of study | Purposive - varied sample of GPs | Purposive - sample practices from academic, community & VA settings | Purposive - 24 informants from 23 NHs   | Convenience sample of practice staff involved in care of 192 patients who agreed to participate | Purposively selected existing Further education and Quality groups - already functioning forum | Convenience                              | Mix - Purposive & convenience                   | Purposive - respondents drawn from sampling frame of 70 GPs who participate/host under grad traini | Purposive - see above | Purposive - teaching & non teaching, rural & urban hosp | Purposive - high and low Prescribers based on results of previous study | Purposive, informed by previous study |

|    |                    |                                                                                    |                                     |    |                                                        |                                 |                                                     |    |                          |                                |                                                                                            |                                                                          |    |                                                                               |                                                                                                                                               |                                                                      |                                                                                 |    |    |    |                   |                                                                                                          |                                 |
|----|--------------------|------------------------------------------------------------------------------------|-------------------------------------|----|--------------------------------------------------------|---------------------------------|-----------------------------------------------------|----|--------------------------|--------------------------------|--------------------------------------------------------------------------------------------|--------------------------------------------------------------------------|----|-------------------------------------------------------------------------------|-----------------------------------------------------------------------------------------------------------------------------------------------|----------------------------------------------------------------------|---------------------------------------------------------------------------------|----|----|----|-------------------|----------------------------------------------------------------------------------------------------------|---------------------------------|
|    |                    |                                                                                    |                                     |    | in large practices                                     | in a local CME discussion group |                                                     |    |                          | etc and then selected randomly | y                                                                                          |                                                                          |    |                                                                               | in the study                                                                                                                                  | s for discussion                                                     |                                                                                 |    | ng |    |                   |                                                                                                          |                                 |
| 11 | Method of approach | How were participants approached? e.g. <i>face-to-face, telephone, mail, email</i> | Initial letter, follow-up telephone | NS | Letter via senior partner. Practice to ID two partners | NS                              | Word-of-mouth, postal mailings, phone solicitations | NS | GPs approached by letter | Letter                         | Via NHs with phone follow-up - necessary to discuss the project due to physician hesitancy | Approached GPs through group coordinator and contacted by phone or email | NS | Face-to-face at professional meetings, email and nurses through calls to NHs. | NS - Recruited from PC research and teaching network of the Dept. of primary care and population studies of the Royal Free and UCL Med School | Through contacts at primary care centres in 3 large cities in Sweden | Division of General Practice newsletters, Flyers at workshops, individual faxes | NS | NS | NS | Telephone & email | Asked (?face-to-face) and then telephone follow-up required to encourage high Prescribers to participate | Letter and follow-up phone call |

|        |                   |                                                                 |                |    |                                            |            |    |                   |                                    |                                                                    |    |                               |                                                                                                    |                          |                                                            |    |                                                                          |         |    |    |                                        |                                                                         |                                              |
|--------|-------------------|-----------------------------------------------------------------|----------------|----|--------------------------------------------|------------|----|-------------------|------------------------------------|--------------------------------------------------------------------|----|-------------------------------|----------------------------------------------------------------------------------------------------|--------------------------|------------------------------------------------------------|----|--------------------------------------------------------------------------|---------|----|----|----------------------------------------|-------------------------------------------------------------------------|----------------------------------------------|
| 1<br>2 | Sample size       | How many participants were in the study?                        | 65             | 7  | 22 GPs, 101 patients, 227 instances of PIP | 8FG, 5 SSI | 33 | 9                 | 10                                 | 38                                                                 | 20 | 39 GPs (20 tutors)            | 36 physicians (2 NPs, 1 pharmacist, 1 physician assistant), primary care, Vet Affairs and academia | 16 physicians (8 Nurses) | 72 Drs/83 practice staff (from 25 practices), 192 patients | 31 | 28 GPs                                                                   | 49GPs   | 22 | 29 | 5 Drs (4 nurses, 3 pharmacists, 17pts) | 10 family physicians, primary care (5 high, 5 low)                      | 10 GPs (5 high continuers, 5 low continuers) |
| 1<br>3 | Non-participation | How many people refused to participate or dropped out? Reasons? | 37, Not stated | NS | NS                                         | NS         | NS | 3 - None provided | 5 - One retired, 2 PT, 2 no reason | High prescribers - 5 - time constraints; Med-low 10% - not stated. | NS | NS - 39/454 GPs, 20/80 Tutors | NS                                                                                                 | NS                       | NS                                                         | NS | Advised participation. Guessing must have responded and 8 declined. Reas | 18 - NS | NS | NS | NS - ?None                             | 13 of the high Prescribers refused - 6 sick leave, 7 mainly due to time | NS                                           |





|                 |                     |                                                                                                              |                                                                                                                           |                                  |                                                                                      |                         |   |           |                                        |                                                                                                                                                                                                                                    |                |                                                                           |                                         |                                                                                                                          |                                                                                                                                     |              |                            |                                                                                |                             |                                                                                                                                   |                                              |                                                                                                                                                                                                                  |    |
|-----------------|---------------------|--------------------------------------------------------------------------------------------------------------|---------------------------------------------------------------------------------------------------------------------------|----------------------------------|--------------------------------------------------------------------------------------|-------------------------|---|-----------|----------------------------------------|------------------------------------------------------------------------------------------------------------------------------------------------------------------------------------------------------------------------------------|----------------|---------------------------------------------------------------------------|-----------------------------------------|--------------------------------------------------------------------------------------------------------------------------|-------------------------------------------------------------------------------------------------------------------------------------|--------------|----------------------------|--------------------------------------------------------------------------------|-----------------------------|-----------------------------------------------------------------------------------------------------------------------------------|----------------------------------------------|------------------------------------------------------------------------------------------------------------------------------------------------------------------------------------------------------------------|----|
|                 |                     |                                                                                                              |                                                                                                                           |                                  |                                                                                      | disc<br>ussion<br>group |   |           | er<br>infor<br>mation<br>provid<br>ed. | vs<br>13.1).<br>Special<br>ist<br>educat<br>ion -<br>50% of<br>high<br>Prescri<br>bers,<br>85% med-<br>low<br>Prescri<br>bers.<br>Some<br>higher<br>Prescri<br>bers<br>had<br>good<br>reputa<br>tions,<br>some<br>electe<br>d reps | 2009<br>.      |                                                                           | Affa<br>irs<br>and<br>aca<br>dem<br>ia. | rienc<br>e (1-<br>40yr<br>s)<br>and<br>posit<br>ion.<br>FT<br>and<br>PT<br>pres<br>cribe<br>rs                           |                                                                                                                                     |              | 14.<br>Mix<br>rural<br>ity |                                                                                | GPs,<br>mostl<br>y<br>urban | es.<br>Mean<br>age 54<br>(39-<br>65).<br>Mix<br>urban<br>/rural.                                                                  |                                              | 50%<br>speci<br>alists<br>.<br>Low<br>pres<br>cribe<br>rs - 3<br>male<br>s, 2<br>fema<br>les,<br>12<br>yrs<br>mean<br>empl<br>oyment,<br>80%<br>speci<br>alists<br>(<br>).<br>Info<br>gather<br>ed<br>in<br>2008 |    |
| Data collection |                     |                                                                                                              |                                                                                                                           |                                  |                                                                                      |                         |   |           |                                        |                                                                                                                                                                                                                                    |                |                                                                           |                                         |                                                                                                                          |                                                                                                                                     |              |                            |                                                                                |                             |                                                                                                                                   |                                              |                                                                                                                                                                                                                  |    |
| 1<br>7          | Intervie<br>w guide | Were<br>question<br>s,<br>prompts,<br>guides<br>provided<br>by the<br>authors?<br>Was it<br>pilot<br>tested? | Yes,<br>Not<br>teste<br>d but<br>iterat<br>ive<br>appro<br>ach<br>subs<br>eque<br>nt to<br>debrief<br>ing<br>sessi<br>ons | Yes,<br>but<br>not<br>teste<br>d | App<br>ropri<br>ate<br>pres<br>crib<br>ing<br>indic<br>ators<br>were<br>provid<br>ed | N                       | Y | Y -<br>NS | Yes<br>&<br>Uns<br>ure                 | Yes &<br>NS. Q's<br>served<br>as<br>checkli<br>st.<br>Asked<br>GPs to<br>provid<br>e<br>narrati<br>ves of<br>the<br>last 3<br>consult<br>ations                                                                                    | Yes<br>&<br>No | Yes &<br>new<br>them<br>es<br>were<br>fed<br>back<br>into<br>later<br>FGs | Yes                                     | Yes<br>&<br>No<br>but<br>adde<br>d 2<br>ques<br>tions<br>to<br>the<br>final<br>FG<br>as a<br>resul<br>t of<br>FB<br>from | No -<br>prag<br>matic<br>appro<br>ach<br>(allo<br>wed<br>partic<br>ipants<br>to<br>show<br>under<br>stand<br>ing,<br>raise<br>issue | Yes &<br>Yes | Yes                        | No -<br>overvi<br>ew of<br>how<br>FG<br>condu<br>cted<br>but no<br>conte<br>nt | No                          | Hypot<br>hetical<br>case<br>study,<br>outlin<br>ed<br>positio<br>n of<br>GP<br>and<br>used<br>questi<br>on<br>probe<br>s<br>where | Yes -<br>publi<br>shed<br>separa<br>tel<br>y | Yes -<br>Not<br>pilot<br>teste<br>d                                                                                                                                                                              | No |

|    |                        |                                                                         |                  |                        |              |              |              |              |              |                                           |                         |                    |             |             |                                        |              |              |              |              |               |              |              |             |
|----|------------------------|-------------------------------------------------------------------------|------------------|------------------------|--------------|--------------|--------------|--------------|--------------|-------------------------------------------|-------------------------|--------------------|-------------|-------------|----------------------------------------|--------------|--------------|--------------|--------------|---------------|--------------|--------------|-------------|
|    |                        |                                                                         |                  |                        |              |              |              |              |              | (gap between ideal thinking and practice) |                         |                    |             | FG's 1 & 2  | s, min risk of them changing behaviour |              |              |              |              | necessary. NS |              |              |             |
| 18 | Repeat interviews      | Were repeat interviews carried out? If yes, how many?                   | NS               | N/A Descriptive survey | NS           | No           | No           | No           | No           | No                                        | No                      | NS                 | No          | NS          | No                                     | No           | No           | No           | NS           | No            | No           | No           | No          |
| 19 | Audio/visual recording | Did the research use audio or visual recording to collect the data?     | Audio taping     | N/A Descriptive survey | Audio taping                              | Recorded (assume audio) | Digitally recorded | Audio taped | Audio taped | No                                     | Audio taping  | Audio taping | Audio taping | Video-taped |
| 20 | Field notes            | Were field notes made during and/or after the interview or focus group? | Yes & debriefing | N/A Descriptive survey | NS           | NS           | NS           | NS           | Yes          | NS                                        | NS                      | Yes                | NS          | Yes         | NS                                     | Yes          | Yes          | NS           | NS           | NS            | NS           | NS           | NS          |

|                                 |                       |                                                                          |    |                        |    |                         |     |          |           |    |        |    |                                                           |        |                                       |                         |                                                             |           |           |                    |       |           |                                                                 |
|---------------------------------|-----------------------|--------------------------------------------------------------------------|----|------------------------|----|-------------------------|-----|----------|-----------|----|--------|----|-----------------------------------------------------------|--------|---------------------------------------|-------------------------|-------------------------------------------------------------|-----------|-----------|--------------------|-------|-----------|-----------------------------------------------------------------|
| 21                              | Duration              | What was the duration of the interviews or focus group?                  | NS | N/A Descriptive survey | NS | FG - NS, SSI - 5-10 min | NS  | 60-90min | NS        | NS | 45 min | NS | 60 min                                                    | 90 min | NS                                    | 60-90min                | 15-30 min                                                   | 45-55 min | NS        | 2 hrs              | 60min | 30-60 min | 32 min (17-54min range)                                         |
| 22                              | Data saturation       | Was data saturation discussed?                                           | NS | N/A Descriptive survey | NS | NS                      | Yes | Yes      | NS        | NS | NS     | NS | NS                                                        | NS     | NS                                    | Yes                     | Yes                                                         | Yes       | Yes       | Yes                | NS    | NS        | NS                                                              |
| 23                              | Transcripts returned  | Were transcripts returned to participants for comment and/or correction? | NS | N/A Descriptive survey | NS | NS                      | NS  | NS       | NS        | NS | NS     | NS | NS                                                        | NS     | NS                                    | NS                      | NS                                                          | Yes       | NS        | NS                 | NS    | NS        | NS                                                              |
| Domain 3: analysis and findings |                       |                                                                          |    |                        |    |                         |     |          |           |    |        |    |                                                           |        |                                       |                         |                                                             |           |           |                    |       |           |                                                                 |
| Data analysis                   |                       |                                                                          |    |                        |    |                         |     |          |           |    |        |    |                                                           |        |                                       |                         |                                                             |           |           |                    |       |           |                                                                 |
| 24                              | Number of data coders | How many data coders coded the data?                                     | 2  | NS                     | 1  | NS                      | NS  | NS       | 3 authors | 1  | NS     | 2  | 2 initially, then one after the coding structure had been | 3      | 2 members participated in discussions | 2 with audit by a third | 3 initially to develop domains and then 1 person thereafter | 2         | 4 authors | 2, 3rd adjudicated | 2     | 2         | 1 author - blinded to which participants were in which category |

|    |                                |                                                             |         |    |         |       |                |                 |         |                                       |         |         |                          |         |         |           |             |                |         |         |                                                 |                             |                                                                                       |     |
|----|--------------------------------|-------------------------------------------------------------|---------|----|---------|-------|----------------|-----------------|---------|---------------------------------------|---------|---------|--------------------------|---------|---------|-----------|-------------|----------------|---------|---------|-------------------------------------------------|-----------------------------|---------------------------------------------------------------------------------------|-----|
|    |                                |                                                             |         |    |         |       |                |                 |         |                                       |         |         | n<br>esta<br>blis<br>hed |         |         |           |             |                |         |         |                                                 |                             |                                                                                       |     |
| 25 | Description of the coding tree | Did authors provide a description of the coding tree?       | Yes     | NS | NS      | NS    | No             | No              | Yes     | Yes                                   | Yes     | Yes     | Yes                      | Yes     | NS      | Yes       | Yes         | Yes            | Yes     | Yes     | Yes                                             | Yes - published separately. | Yes                                                                                   | Yes |
| 26 | Derivation of themes           | Were themes identified in advance or derived from the data? | Derived | NS | Derived | NS    | Derived        | No clear themes | Derived | Both - Few preferred themes were used | Derived | Derived | Derived                  | Derived | Derived | Derived   | Derived     | Derived        | Derived | Derived | Both - Inductive and defined descriptive codes. | Derived                     | In advance and derived (from responses to questions from extensive literature review) |     |
| 27 | Software                       | What software, if applicable, was used to manage the data?  | N/A     | NS | N/A     | Nvivo | QSR N Vivo 2.0 | N/A             | Nvivo 7 | N/A                                   | N/A     | NS      | NS                       | NS      | N/A     | Nvivo 1.2 | NS          | QSR NUD.IST 40 | NS      | NS      | Nvivo 1.2                                       | NS                          | NS                                                                                    |     |
| 28 | Participant checkin            | Did participants                                            | NS      | NS | NS      | NS    | NS             | NS              | NS      | NS                                    | NS      | NS      | NS                       | NS      | NS      | NS        | Yes - 3 GPs | NS             | NS      | NS      | Yes                                             | NS                          | NS                                                                                    |     |

|           |                              |                                                                                                                                          |     |     |     |     |          |     |     |     |                              |     |           |                                                |                    |               |                                           |          |     |     |     |     |           |
|-----------|------------------------------|------------------------------------------------------------------------------------------------------------------------------------------|-----|-----|-----|-----|----------|-----|-----|-----|------------------------------|-----|-----------|------------------------------------------------|--------------------|---------------|-------------------------------------------|----------|-----|-----|-----|-----|-----------|
|           | g                            | provide feedback on the findings?                                                                                                        |     |     |     |     |          |     |     |     |                              |     |           |                                                |                    |               | did                                       |          |     |     |     |     |           |
| Reporting |                              |                                                                                                                                          |     |     |     |     |          |     |     |     |                              |     |           |                                                |                    |               |                                           |          |     |     |     |     |           |
| 29        | Quotations presented         | Were participant quotations presented to illustrate the themes / findings? Was each quotation identified? e.g. <i>participant number</i> | Yes | No  | Yes | Yes | Yes & No | No  | Yes | Yes | Yes (& they were identified) | Yes | Yes & Yes | Yes - limited though and no participant number | No                 | Yes           | Yes & No                                  | Yes & No | Yes | Yes | Yes | Yes | Yes & Yes |
| 30        | Data and findings consistent | Was there consistency between the data presented and the findings?                                                                       | Yes | Yes | Yes | Yes | Yes      | Yes | Yes | Yes | Yes                          | Yes | Yes       | Yes                                            | Too ltd to comment | Yes - v clear | Yes - also triangulated findings with pts | Yes      | Yes | Yes | Yes | Yes | Yes       |

|        |                         |                                                                        |     |                 |                                                                                 |                |     |    |                        |                                                                      |                                                                                  |                                         |                                                                    |                                                     |                                  |                                   |                                                               |                                                               |                                 |                                                       |                                                      |                                                    |                                                    |
|--------|-------------------------|------------------------------------------------------------------------|-----|-----------------|---------------------------------------------------------------------------------|----------------|-----|----|------------------------|----------------------------------------------------------------------|----------------------------------------------------------------------------------|-----------------------------------------|--------------------------------------------------------------------|-----------------------------------------------------|----------------------------------|-----------------------------------|---------------------------------------------------------------|---------------------------------------------------------------|---------------------------------|-------------------------------------------------------|------------------------------------------------------|----------------------------------------------------|----------------------------------------------------|
| 3<br>1 | Clarity of major themes | Were major themes clearly presented in the findings?                   | Yes | Yes             | Yes                                                                             | No - too small | Yes | No | Yes                    | Yes                                                                  | Yes - prescribe r approaches to treatment of sleep disorders with drugs in RAC F | Yes                                     | Yes                                                                | 3 clear themes although results section was limited | No                               | Yes - v clear                     | Yes                                                           | Yes                                                           | Yes                             | Yes                                                   | Yes                                                  | Yes                                                | Yes                                                |
| 3<br>2 | Clarity of minor themes | Is there a description of diverse cases or discussion of minor themes? | No  | Yes but limited | No - Presented one instance of diverse views re: patient receptivity to change. | No - too small | No  | No | Yes - although limited | Yes - Premise of paper to explore views of low and high Prescribers. | Yes - apparent in three subthemes of paper                                       | No but comprehensive given diverse aims | Discussion of conflicting views and minor themes (e.g. guidelines) | Ltd information in paper                            | Conflicting views were presented | Yes - presented conflicting views | Yes & in methodology described these as 'typical' or variant' | Yes - captured minor themes in text but not under subheadings | Yes - presented 'outlier views' | Consistently presented counterbalancing point of view | Theory and data triangulation - stronger methodology | Captured in methodology - high and low prescribers | Captured in methodology - high and low prescribers |
